# Supplementary material for: Inhibitory Effects of Epipolythiodioxopiperazine Fungal Metabolites on Isocitrate Lyase in the Glyoxylate Cycle of Candida albicans
Source: MDPI journal article supplement (doi:10.3390/md19060295), 2021-05-22
Supplement: s1 [file s1]

## **Supporting Information**

### **Inhibitory Effects of Epipolythiodioxopiperazine Fungal Metabolites on Isocitrate Lyase in the Glyoxylate Cycle of *Candida albicans***

Ji-Yeon Hwang <sup>1</sup>, Beomkoo Chung <sup>2</sup>, Oh-Seok Kwon <sup>1</sup>, Sung Chul Park <sup>1</sup>, Eunji Cho <sup>2</sup>,

Dong-Chan Oh <sup>1</sup>, Jongheon Shin <sup>1,\*</sup> and Ki-Bong Oh <sup>2,\*</sup>

<sup>1</sup> Natural Products Research Institute, College of Pharmacy, Seoul National University,  
Seoul 08826, Korea

<sup>2</sup> Department of Agricultural Biotechnology, College of Agriculture and Life Sciences,  
Seoul National University, Seoul 08826, Korea

## Contents

|           |                                                                                                 |     |
|-----------|-------------------------------------------------------------------------------------------------|-----|
| Figure S1 | The $^1\text{H}$ NMR spectrum of secoemestrin C ( <b>1</b> ) (400MHz, $\text{CDCl}_3$ )         | 3   |
| S         |                                                                                                 |     |
| Figure S2 | The $^{13}\text{C}$ NMR spectrum of secoemestrin C ( <b>1</b> ) (100MHz, $\text{CDCl}_3$ )----- | S4  |
| Figure S3 | The $^1\text{H}$ NMR spectrum of dethiosecoemestrin ( <b>2</b> ) (400MHz, $\text{CDCl}_3$ )     | 5   |
| S         |                                                                                                 |     |
| Figure S4 | The $^{13}\text{C}$ NMR spectrum of dethiosecoemestrin ( <b>2</b> ) (100MHz, $\text{CDCl}_3$ )  | 6   |
| S         |                                                                                                 |     |
| Figure S5 | The $^1\text{H}$ NMR spectrum of emestrin ( <b>3</b> ) (800MHz, $\text{DMSO}-d_6$ )-----        | S7  |
| Figure S6 | The $^{13}\text{C}$ NMR spectrum of emestrin ( <b>3</b> ) (200MHz, $\text{DMSO}-d_6$ )-----     | S8  |
| Figure S7 | The $^1\text{H}$ NMR spectrum of emestrin B ( <b>4</b> ) (600MHz, $\text{CDCl}_3$ )-----        | S9  |
| Figure S8 | The $^{13}\text{C}$ NMR spectrum of emestrin B ( <b>4</b> ) (150MHz, $\text{CDCl}_3$ )-----     | S10 |
| Table S1  | The Deviations with literature of $^{13}\text{C}$ NMR Chemical shifts of <b>1-4</b>             |     |
| S         | 1                                                                                               | 1   |

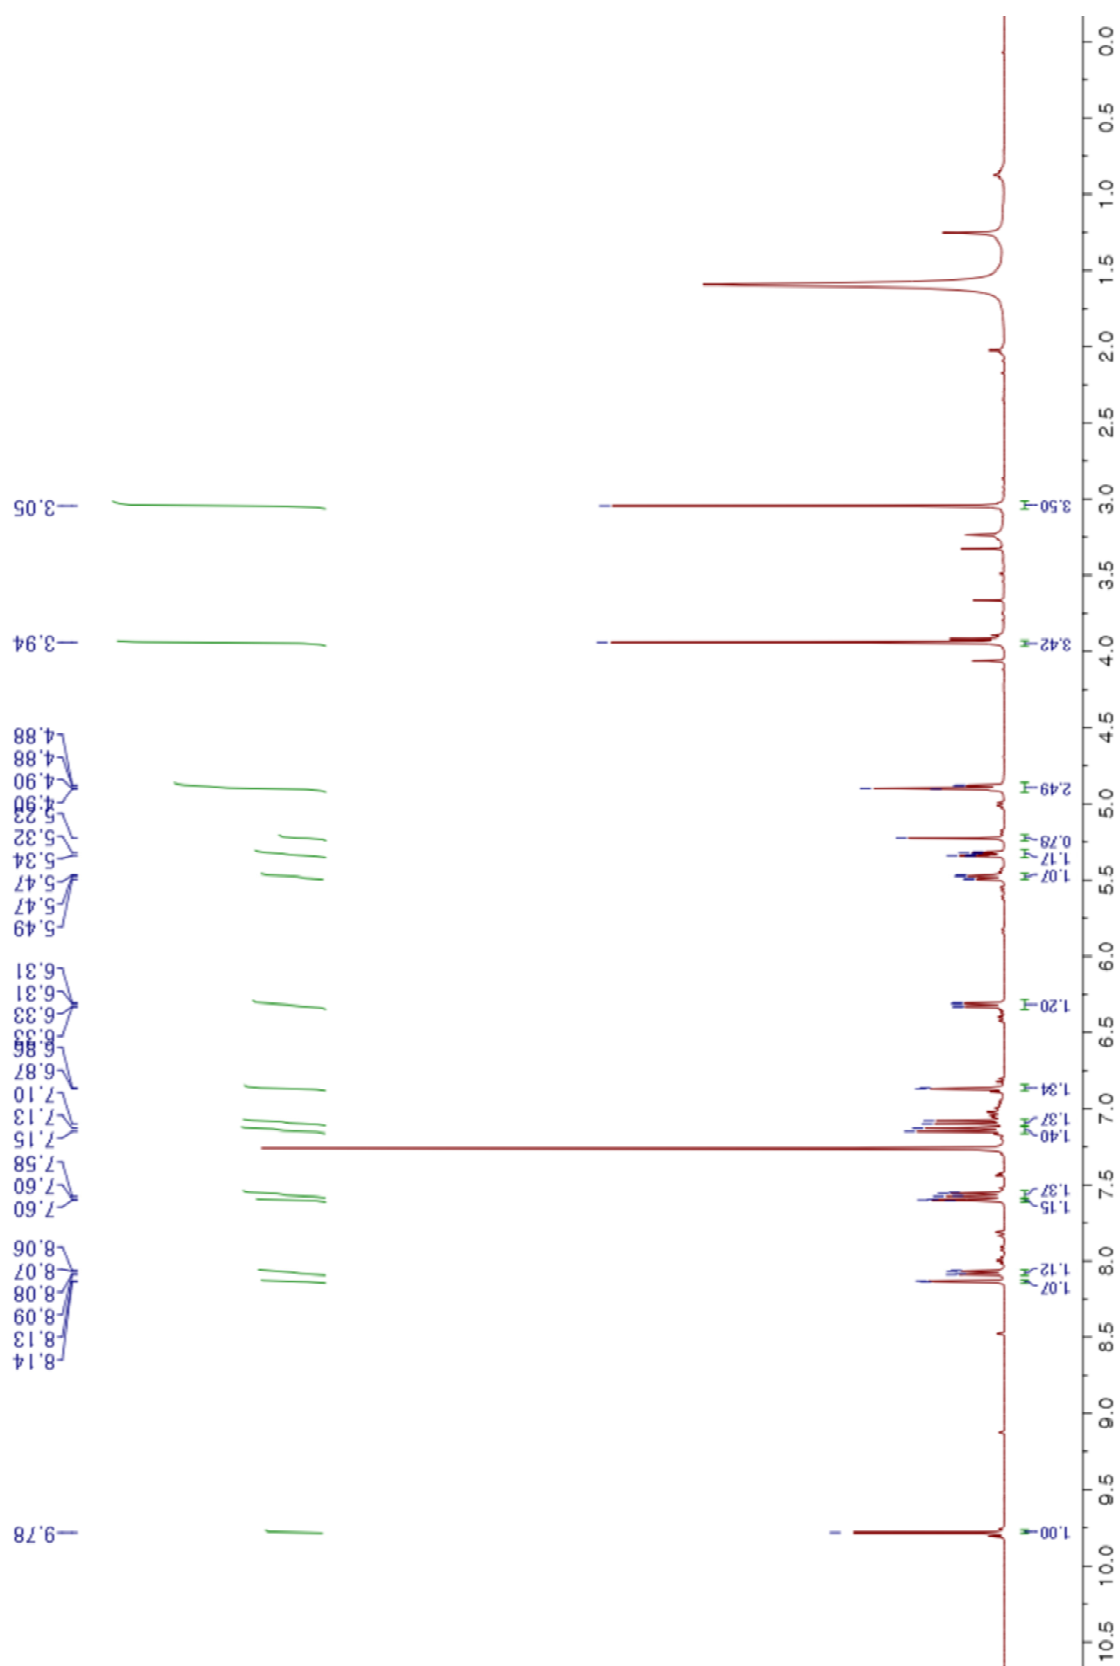

**Figure S1.** The  $^1\text{H}$  NMR spectrum of secoemestrin C (1) (400MHz,  $\text{CDCl}_3$ )

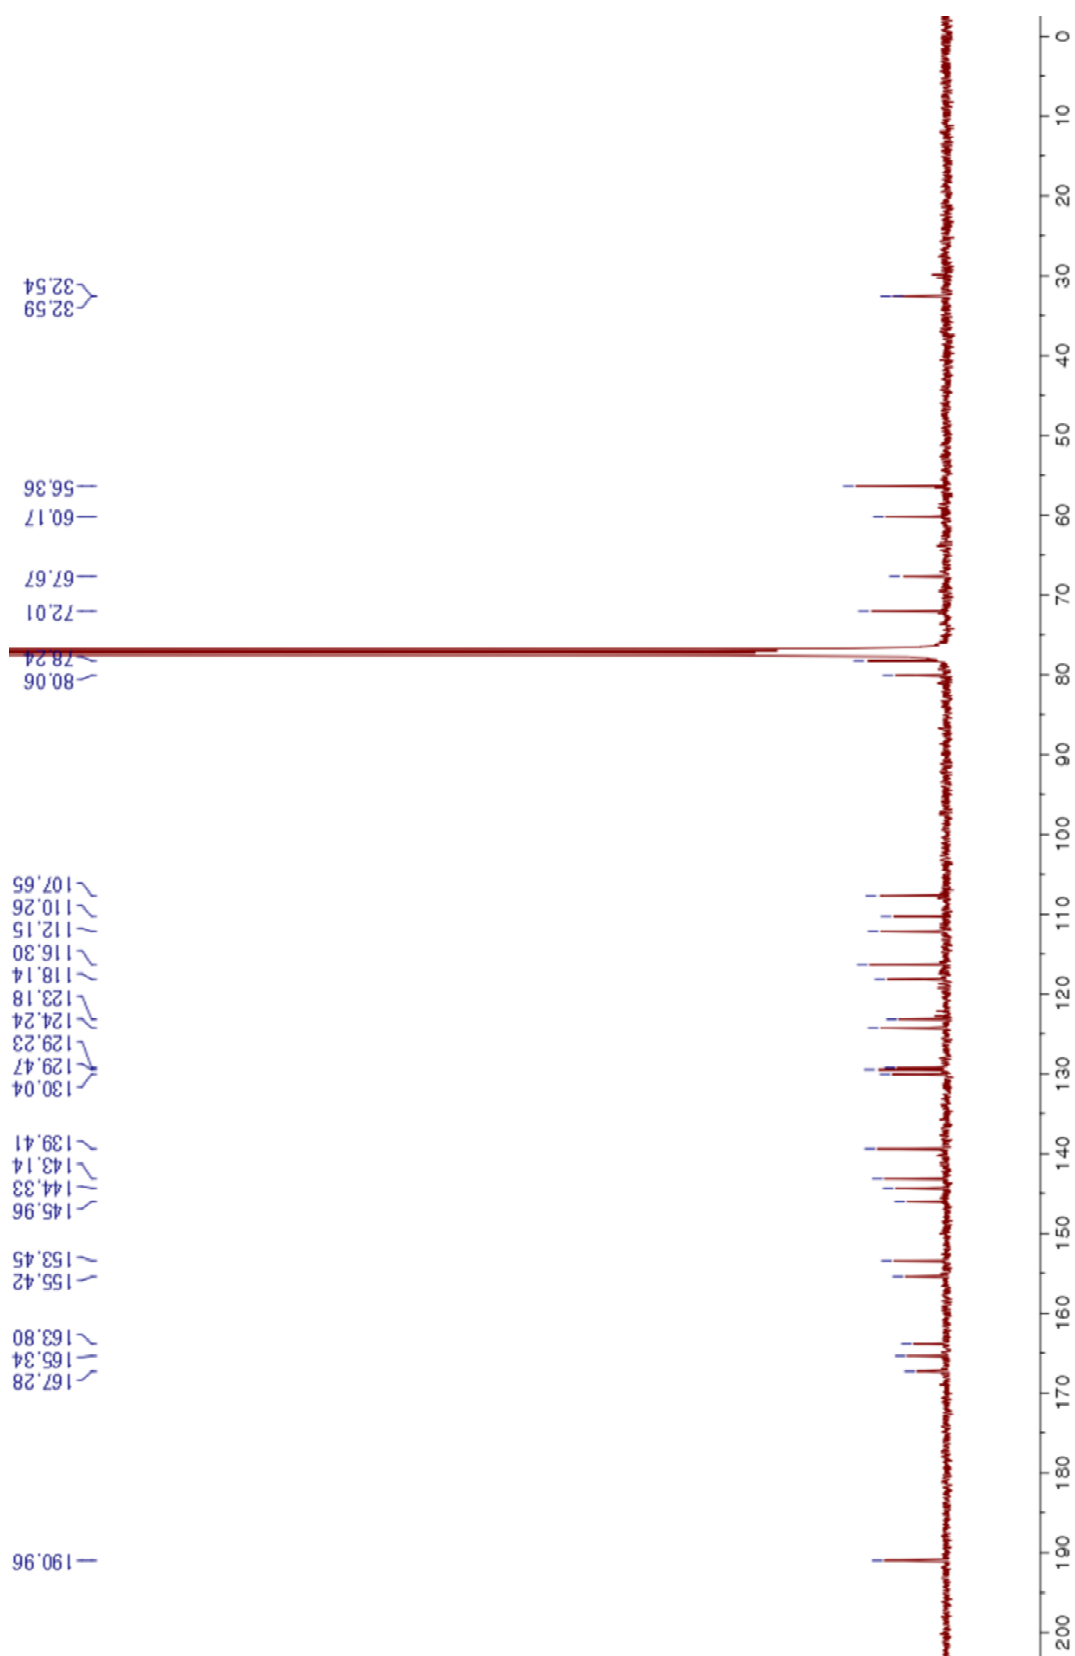

**Figure S2.** The <sup>13</sup>C NMR spectrum of secoemestrin C (1) (100MHz, CDCl<sub>3</sub>)

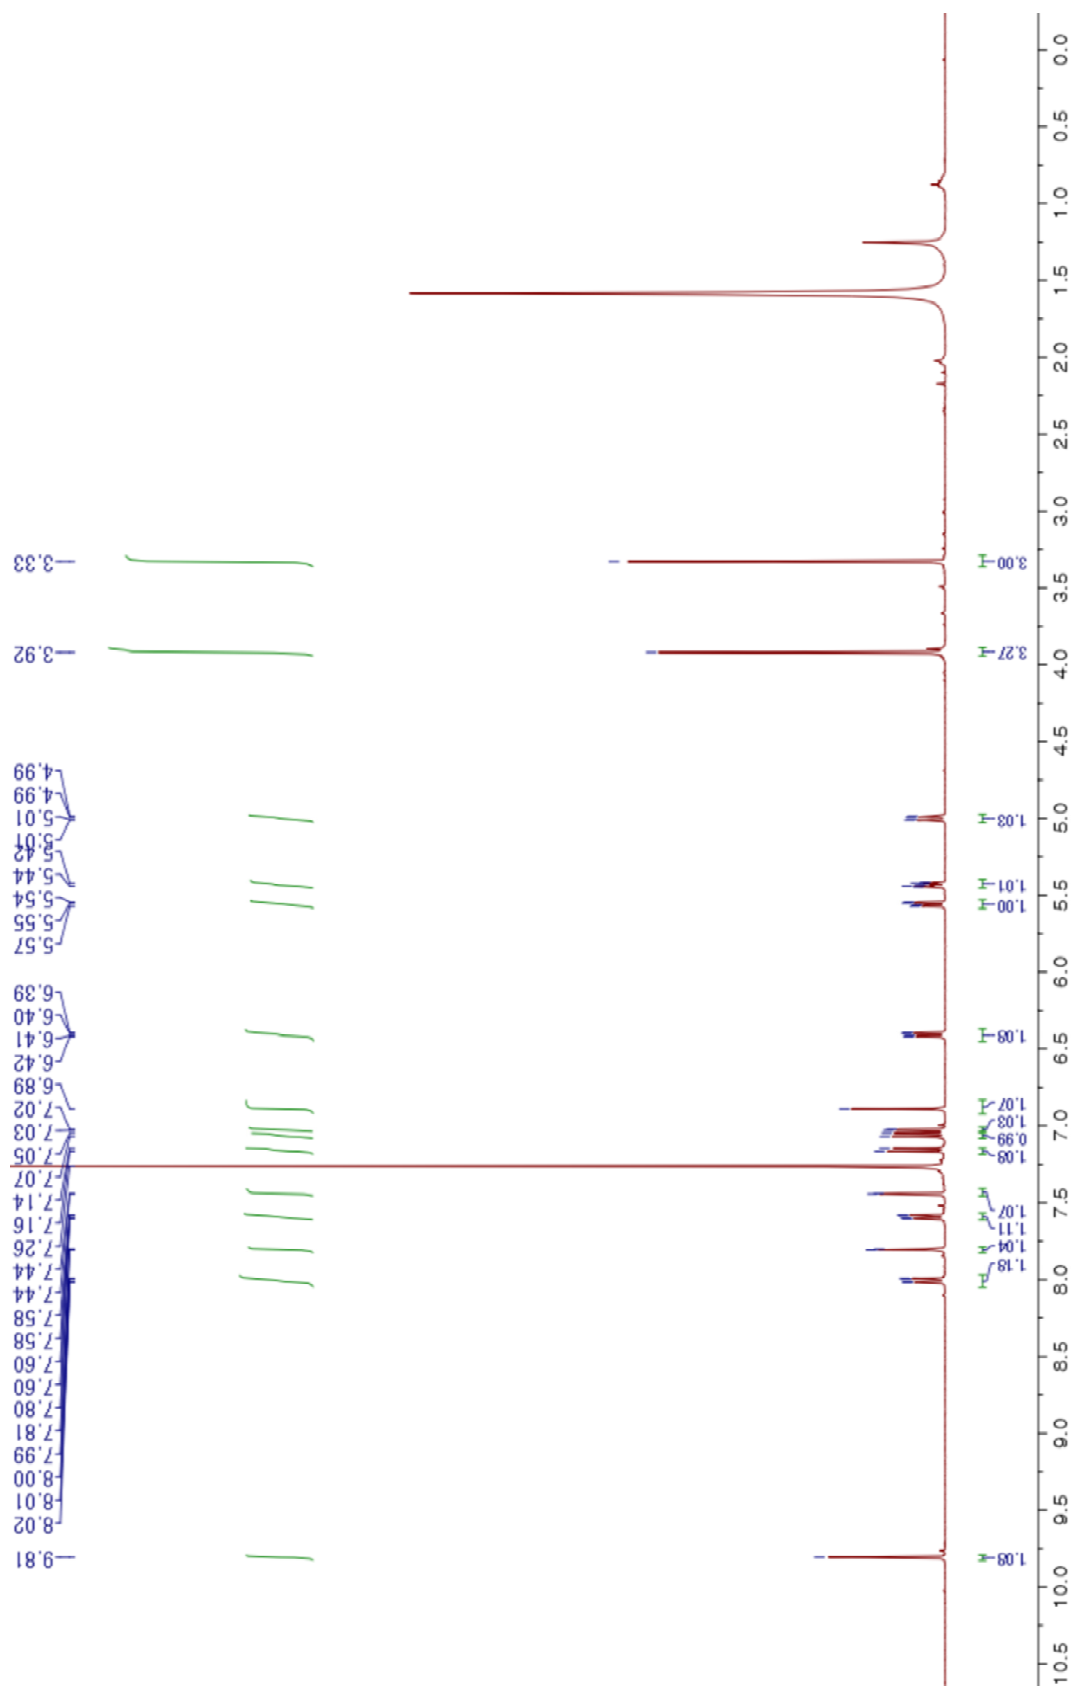

**Figure S3.** The  $^1\text{H}$  NMR spectrum of dethiosecoemestrin (2) (400MHz,  $\text{CDCl}_3$ )

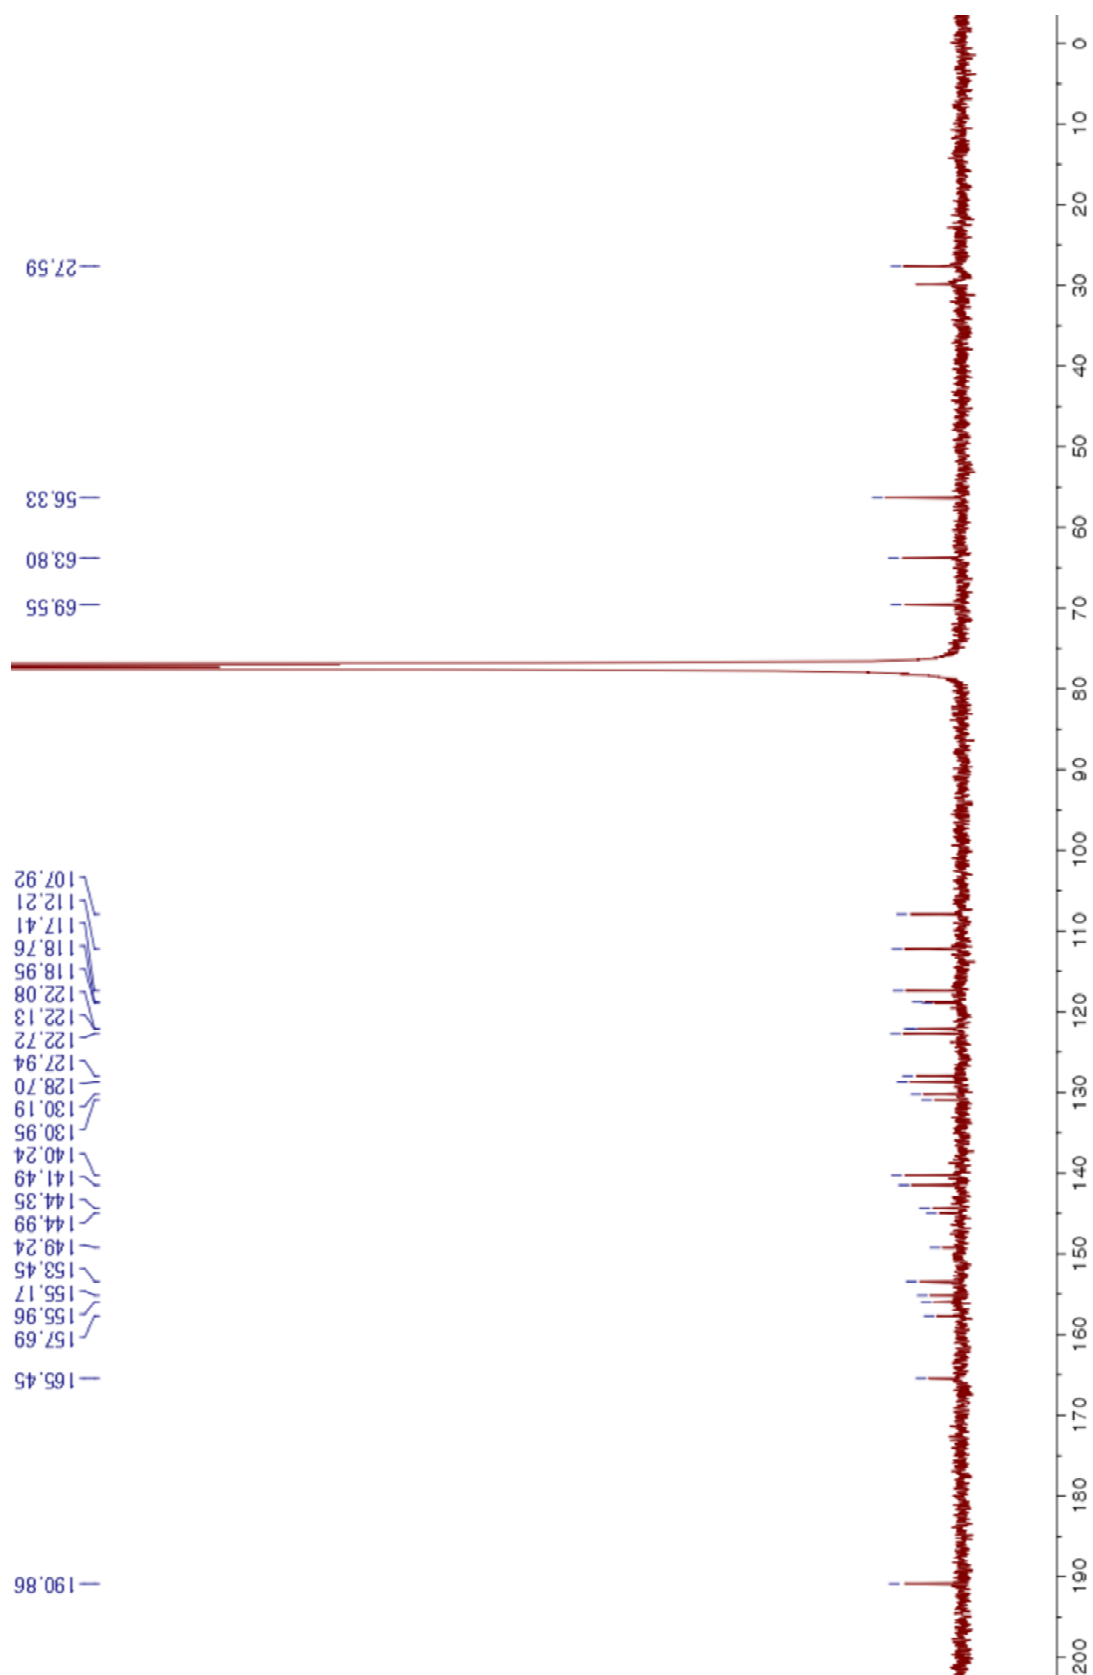

**Figure S4.** The  $^{13}\text{C}$  NMR spectrum of dethiosecoemestrin (**2**) (100MHz,  $\text{CDCl}_3$ )

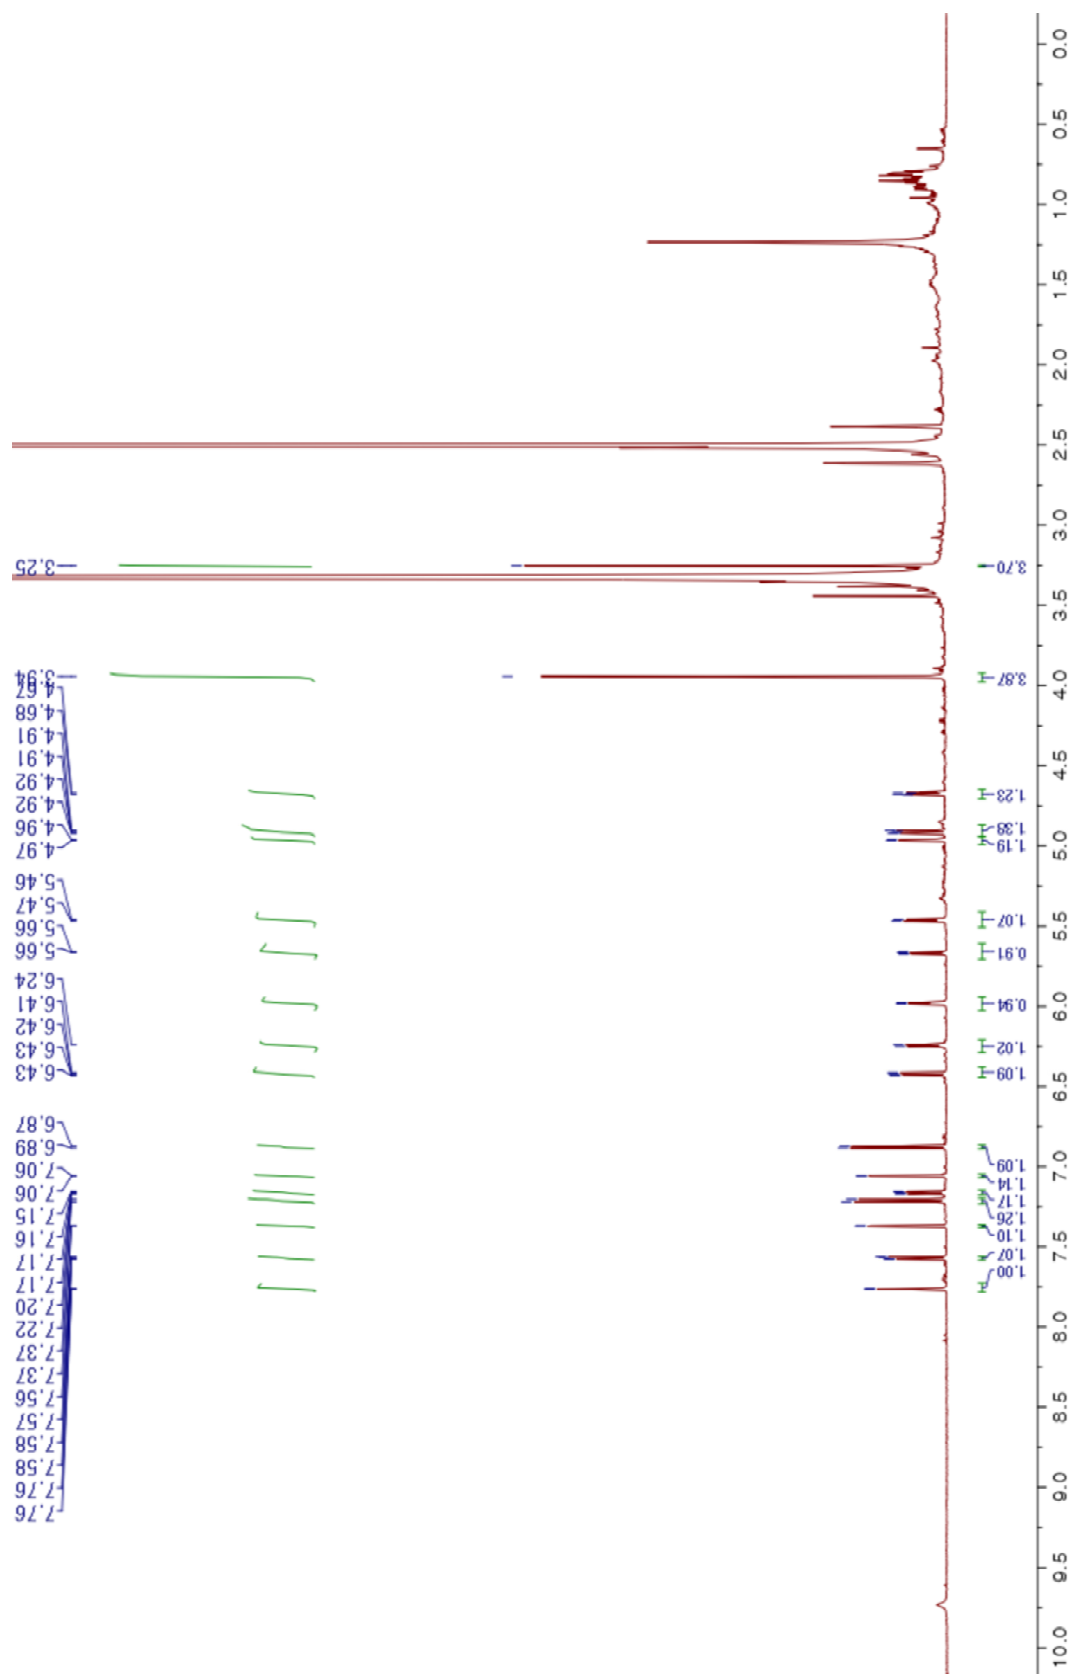

**Figure S5.** The  $^1\text{H}$  NMR spectrum of emestrin (**3**) (800MHz,  $\text{DMSO}-d_6$ )

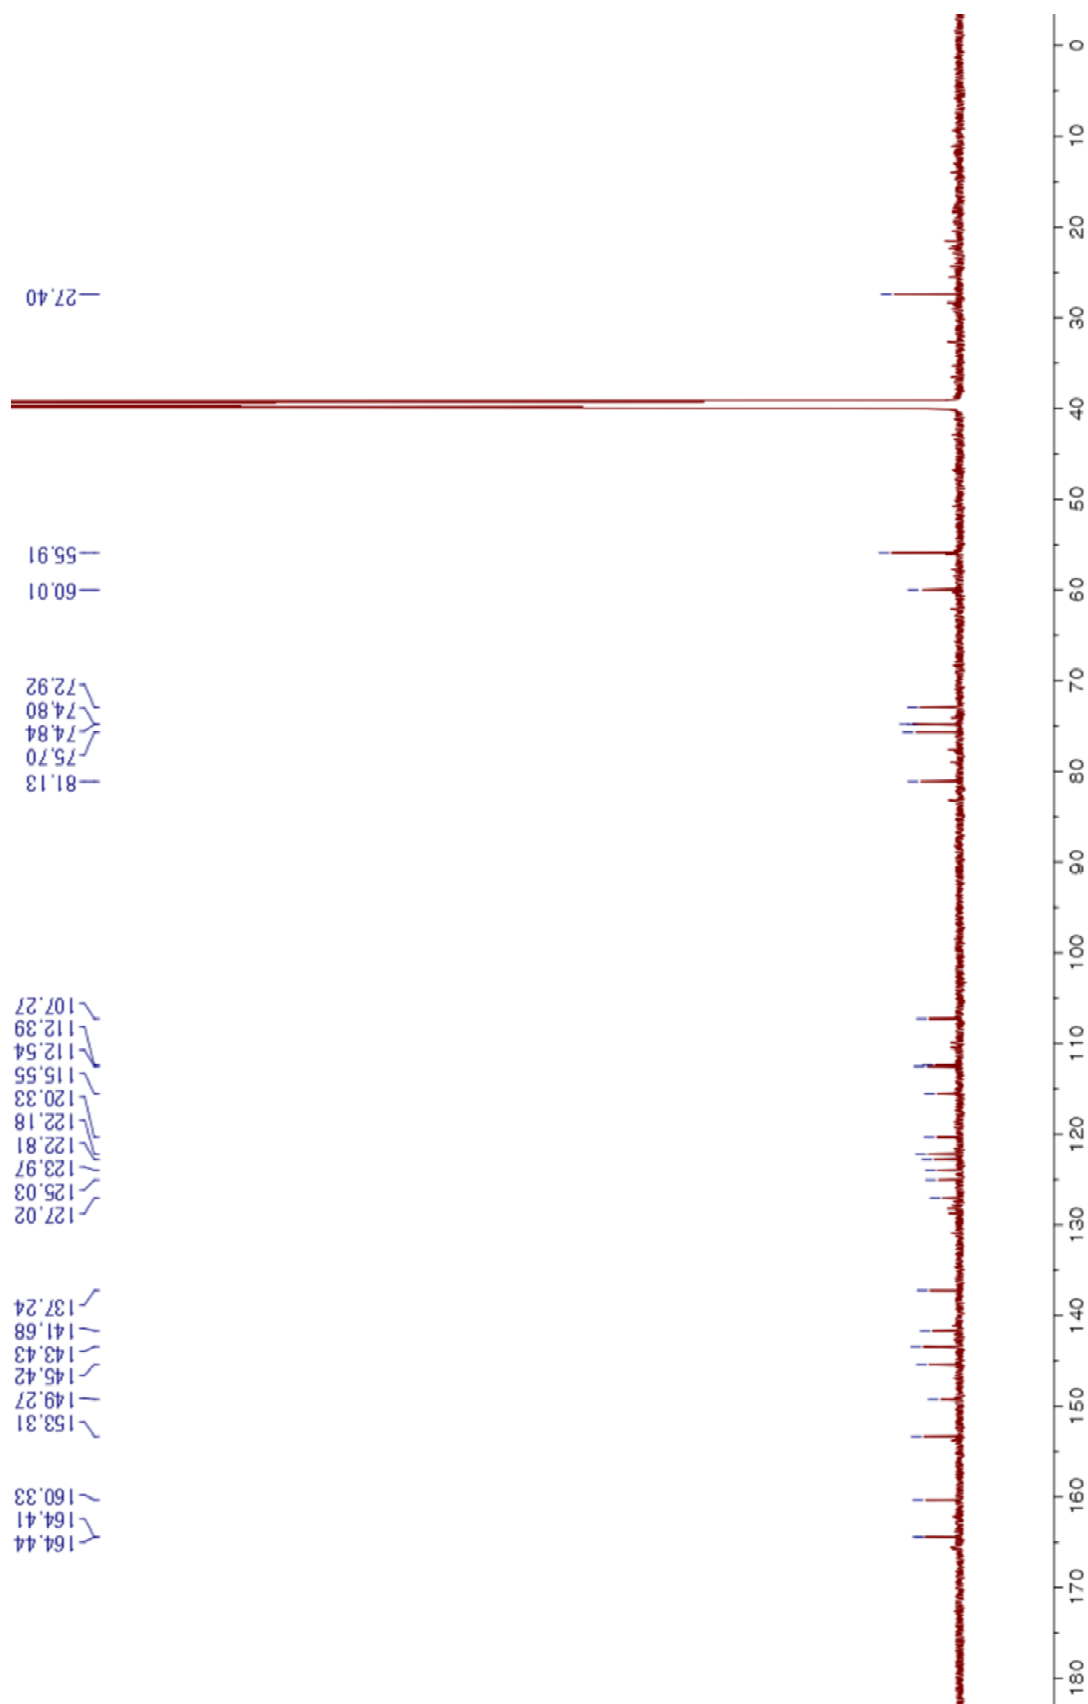

**Figure S6.** The  $^{13}\text{C}$  NMR spectrum of emestrin (3) (200MHz,  $\text{DMSO}-d_6$ )



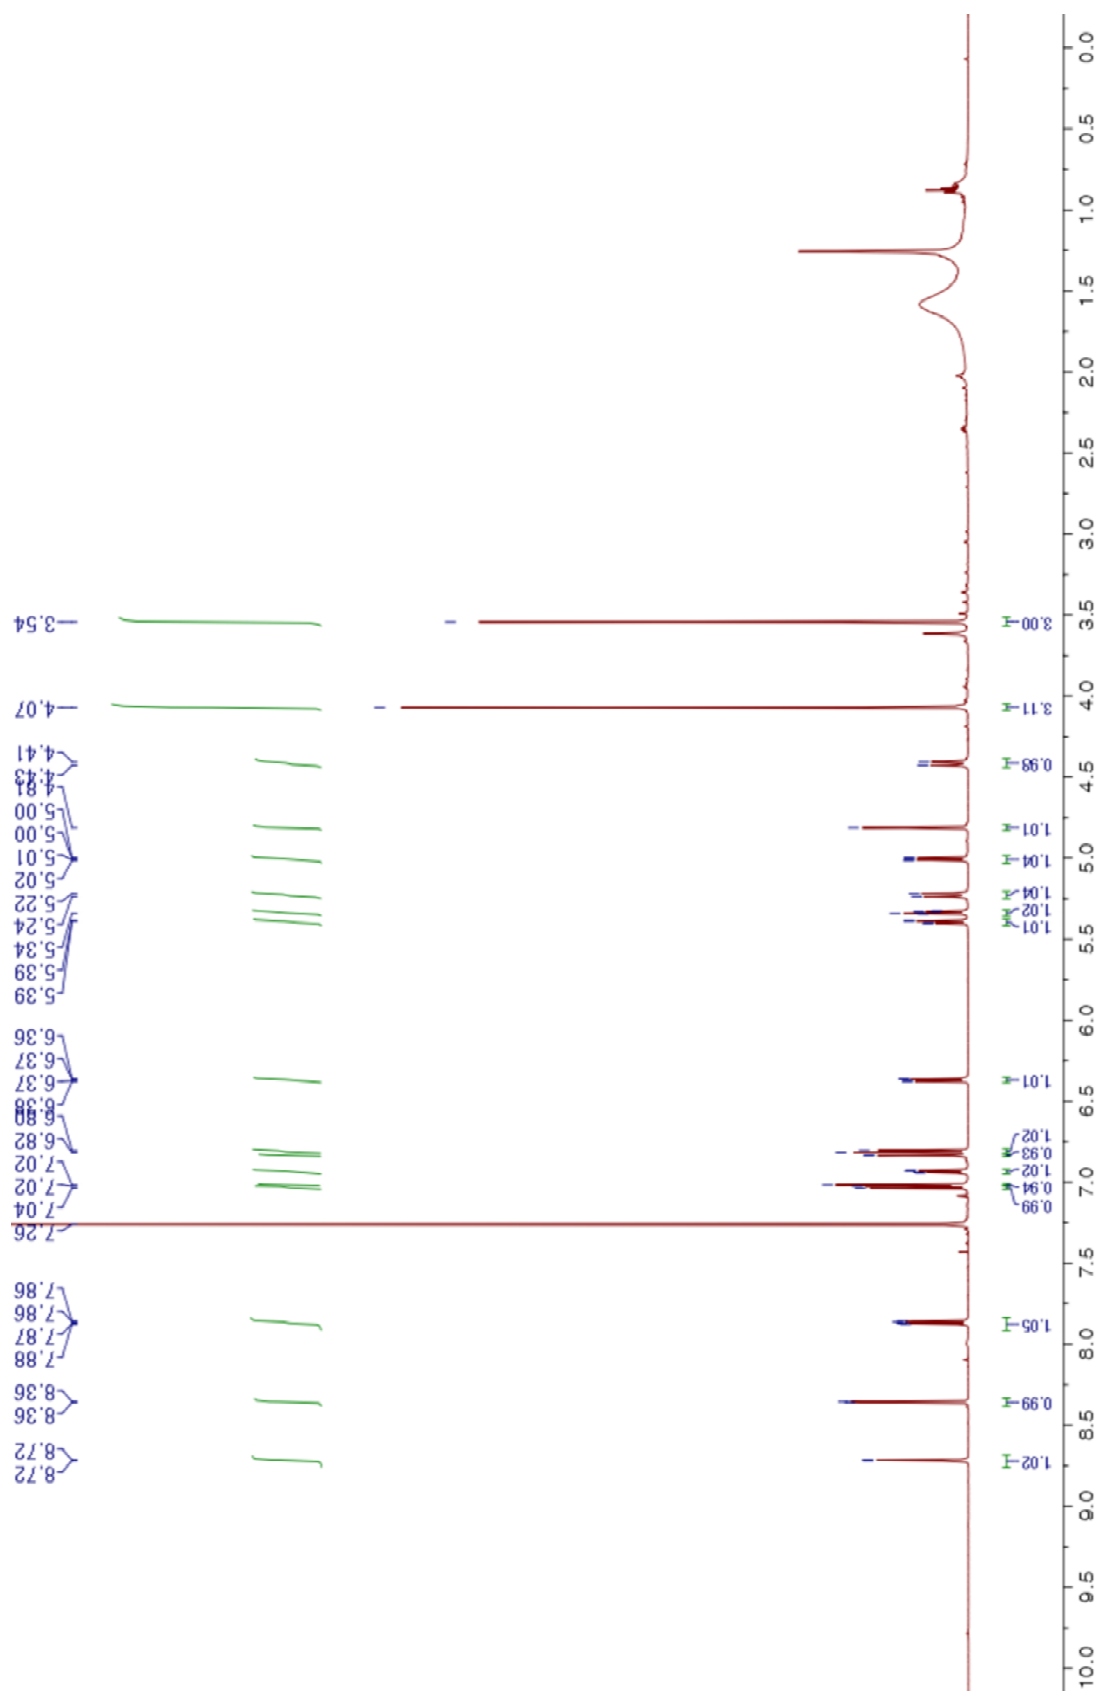

**Figure S7.** The <sup>1</sup>H NMR spectrum of emestrin B (4) (600MHz, CDCl<sub>3</sub>)

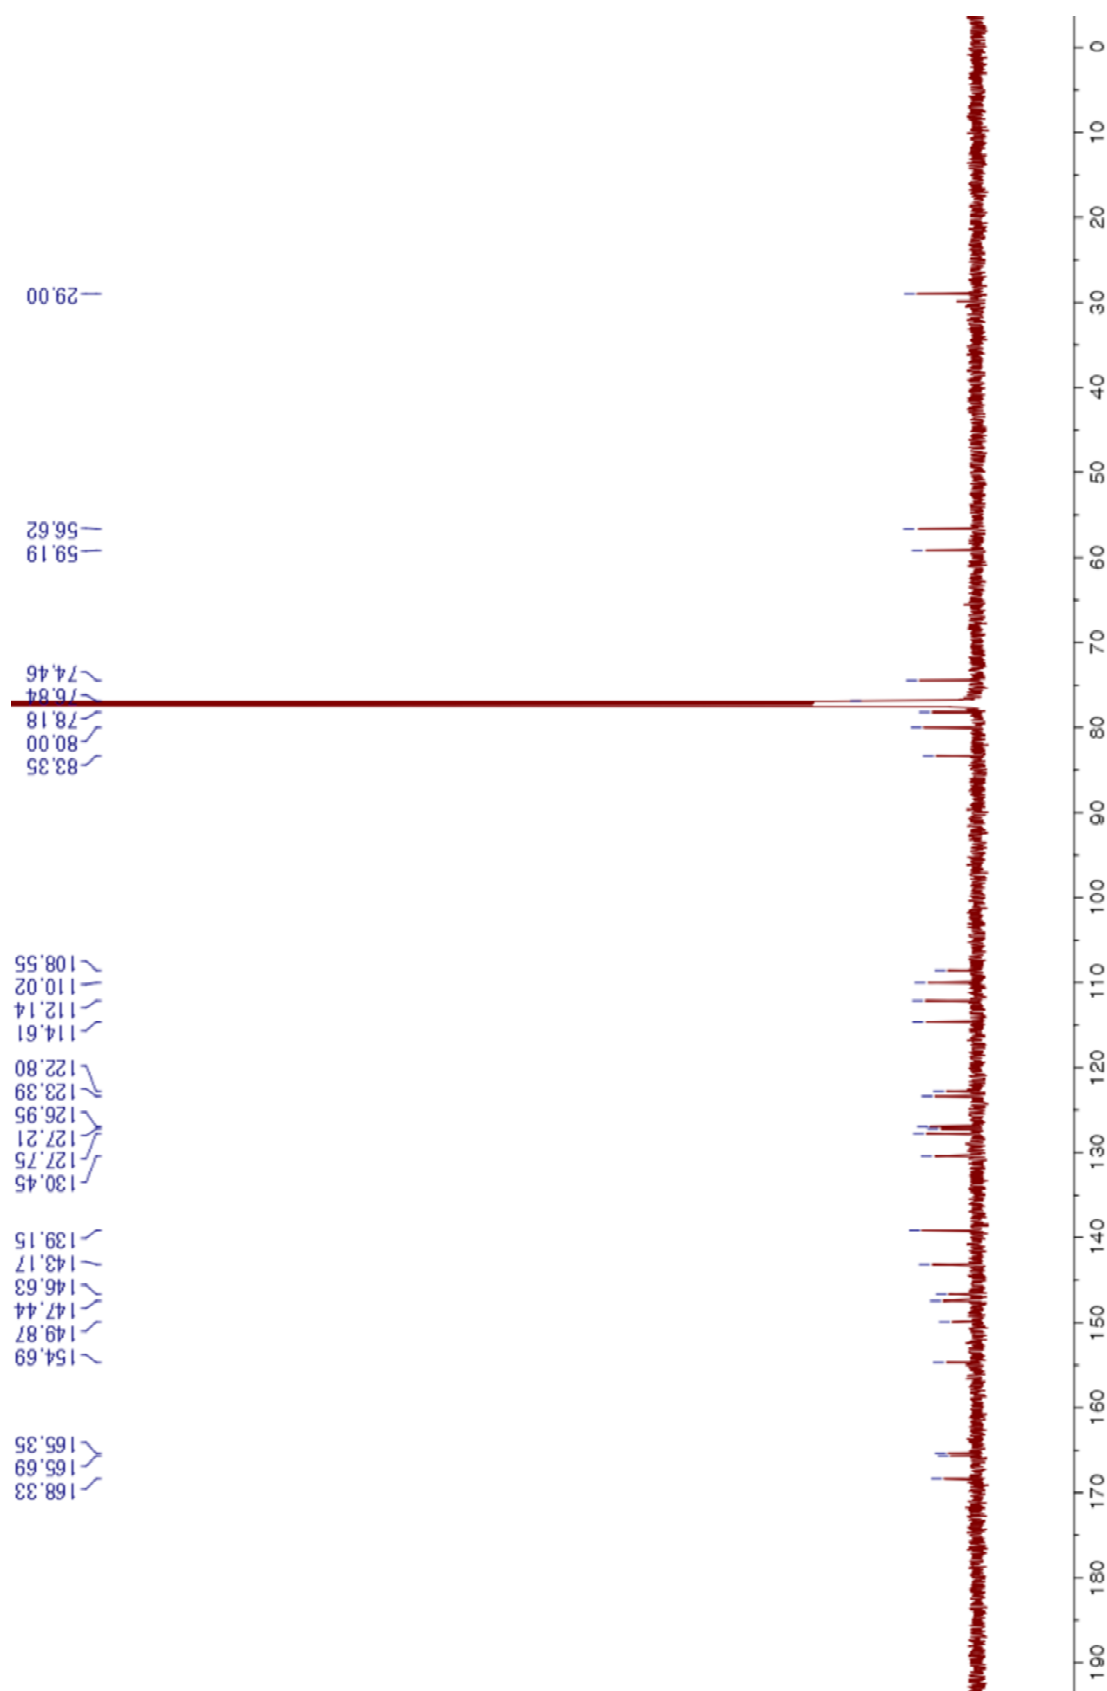

**Figure S8.** The  $^{13}\text{C}$  NMR spectrum of emestrin B (**4**) (150MHz,  $\text{CDCl}_3$ )

**Table S1.** The Deviations with literature of  $^{13}\text{C}$  NMR Chemical shifts **1-4**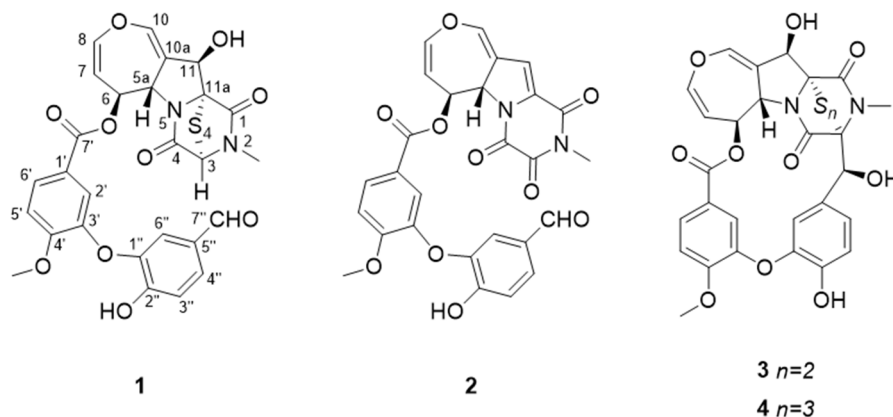

|        | secoemestrin C ( <b>1</b> ) |          |      | dethiosecoemestrin |          |      | emestrin ( <b>3</b> ) |          |      | emestrin B ( <b>4</b> ) |          |      |
|--------|-----------------------------|----------|------|--------------------|----------|------|-----------------------|----------|------|-------------------------|----------|------|
| No.    | Ref. <sup>1</sup>           | <b>1</b> | Dev  | Ref. <sup>2</sup>  | <b>2</b> | Dev  | Ref. <sup>3</sup>     | <b>3</b> | Dev  | Ref. <sup>4</sup>       | <b>4</b> | Dev  |
| 1      | 166.7                       | 167.3    | -0.6 | 155.9              | 155.9    | 0    | 164.3                 | 164.4    | -0.1 | 165.7                   | 165.7    | 0    |
| 2-NMe  | 32.3                        | 32.6     | -0.3 | 27.3               | 27.6     | -0.3 | 27.3                  | 27.4     | -0.1 | 29.0                    | 29.0     | 0    |
| 3      | 68.6                        | 67.7     | 0.9  | 157.5              | 157.7    | -0.2 | 75.6                  | 75.7     | -0.1 | 83.3                    | 83.4     | -0.1 |
| 4      | 164.3                       | 163.8    | 0.5  | 149.2              | 149.2    | 0    | 160.6                 | 160.3    | 0.3  | 165.4                   | 165.4    | 0    |
| 5a     | 60.2                        | 60.2     | 0    | 63.8               | 63.8     | 0    | 59.9                  | 60.0     | -0.1 | 59.2                    | 59.2     | 0    |
| 6      | 72.7                        | 72       | 0.7  | 69.4               | 69.6     | -0.2 | 72.9                  | 72.9     | 0    | 74.9                    | 74.5     | 0.4  |
| 7      | 108.5                       | 107.7    | 0.8  | 107.8              | 107.9    | -0.1 | 107.2                 | 107.3    | -0.1 | 110.0                   | 110.0    | 0    |
| 8      | 140.0                       | 139.4    | 0.6  | 140.2              | 140.2    | 0    | 137.2                 | 137.2    | 0    | 139.2                   | 139.2    | 0    |
| 10     | 142.3                       | 143.1    | -0.8 | 141.2              | 141.5    | -0.3 | 141.7                 | 141.7    | 0    | 143.2                   | 143.2    | 0    |
| 10a    | 113.2                       | 110.3    | 2.9  | 118.9              | 118.9    | 0    | 112.4                 | 112.5    | -0.1 | 108.5                   | 108.6    | -0.1 |
| 11     | 78.6                        | 78.2     | 0.4  | 122.2              | 122.1    | 0.1  | 74.8                  | 74.8     | 0    | 76.8                    | 76.8     | 0    |
| 11a    | 81.1                        | 80.1     | 1.0  | 131.2              | 130.9    | 0.3  | 81.0                  | 81.1     | -0.1 | 78.1                    | 78.2     | -0.1 |
| 1'     | 123.8                       | 124.2    | -0.4 | 122.2              | 122.7    | -0.5 | 122.2                 | 122.2    | 0    | 122.8                   | 122.8    | 0    |
| 2'     | 122.9                       | 123.2    | -0.3 | 122.2              | 122.1    | 0.1  | 123.9                 | 123.9    | 0    | 130.5                   | 130.5    | 0    |
| 3'     | 145.4                       | 144.3    | 1.1  | 144.3              | 144.4    | -0.1 | 143.4                 | 143.4    | 0    | 146.6                   | 146.6    | 0    |
| 4'     | 156.2                       | 155.4    | 0.8  | 155.2              | 155.2    | 0    | 148.9                 | 149.3    | -0.4 | 149.9                   | 149.9    | 0    |
| 4'-OMe | 56.7                        | 56.4     | 0.3  | 56.2               | 56.3     | -0.1 | 55.8                  | 55.9     | -0.1 | 56.7                    | 56.6     | 0.1  |
| 5'     | 113.2                       | 112.2    | 1.0  | 112.2              | 112.2    | 0    | 115.4                 | 115.5    | -0.1 | 112.1                   | 112.1    | 0    |
| 6'     | 129.0                       | 129.5    | -0.5 | 128.6              | 128.7    | -0.1 | 124.9                 | 125.0    | -0.1 | 127.8                   | 127.8    | 0    |
| 7'     | 165.8                       | 165.3    | 0.5  | 165.2              | 165.5    | -0.3 | 164.4                 | 164.4    | 0    | 168.3                   | 168.3    | 0    |
| 1''    | 146.5                       | 145.9    | 0.6  | 145.1              | 144.9    | 0.2  | 145.3                 | 145.4    | -0.1 | 147.4                   | 147.4    | 0    |
| 2''    | 154.6                       | 153.5    | 1.1  | 153.3              | 153.5    | -0.2 | 153.3                 | 153.3    | 0    | 154.7                   | 154.7    | 0    |
| 3''    | 117.7                       | 116.3    | 1.4  | 117.2              | 117.4    | -0.2 | 112.3                 | 112.4    | -0.1 | 114.6                   | 114.6    | 0    |
| 4''    | 128.5                       | 129.2    | -0.7 | 127.6              | 127.9    | -0.3 | 122.7                 | 122.8    | -0.1 | 126.9                   | 126.9    | 0    |
| 5''    | 130.8                       | 130.1    | 0.7  | 130.1              | 130.2    | -0.1 | 127.1                 | 127.0    | 0.1  | 127.2                   | 127.2    | 0    |
| 6''    | 118.5                       | 118.1    | 0.4  | 118.7              | 118.8    | -0.1 | 120.4                 | 120.3    | 0.1  | 123.4                   | 123.4    | 0    |
| 7''    | 190.9                       | 190.9    | 0    | 190.5              | 190.9    | -0.4 | 74.8                  | 74.8     | 0    | 79.9                    | 80.0     | -0.1 |

<sup>1</sup> Ooike, M.; Nozawa, K.; Kawai, K.-I. An epitetrahydrodioxopiperazine related to emestrin from *Emericella foveolata*. *Phytochemistry* **1997**, 46, 123–126.

<sup>2</sup> Seya, H.; Nozawa, K.; Udagawa, S.-I.; Nakajima, S.; Kawai, K.-I. Studies on fungal products. IX. dethiosecoemestrin, a new metabolite related to emestrin, from *Emericella striata*. *Chem. Pharm.*

*Bull.* **1986**, 34, 2411–2416.

<sup>3</sup> Seya, H.; Nozawa, K.; Nakajima, S.; Kawai, K.-I.; Udagawa, S.-I. Studies on fungal products. Part 8. Isolation and structure of emestrin, a novel antifungal macrocyclic epidithiodioxopiperazine from *Emericeella striata*. X-Ray molecular structure of emestrin. *J. Chem. Soc. Perk. T. 1* **1986**, 1986, 109–116.

<sup>4</sup> Nozawa, K.; Udagawa, S.; Nakajima, S.; Kawai, K. Studies on fungal products. XIV. emestrin B, a new epitritiodioxopiperazine, from *Emericella striata*. *Chem. Pharm. Bull.* **1987**, 35, 3460–3463.
